# Supplementary material for: NIR afterglow nanosystem for photodynamic therapy
Source: Royal Society of Chemistry journal article supplement (doi:10.1039/d4ra03312d), 2024-01-01
Supplement: d4ra03312d1.pdf [file d4ra03312d1.pdf]

1 Supporting Information

2

3 **NIR Afterglow Nanosystem for Photodynamic Therapy**

10 Bingxin Shu,<sup>a</sup> Shubi Zhao,<sup>b</sup> Yuling Zhang,<sup>a</sup> Qinchao Sun<sup>\*b</sup> and Zhen Huang<sup>\*c</sup>

11

12

13

---

4 <sup>a</sup>Shenzhen Clinical Medical College, Guangzhou University of Chinese Medicine, Shenzhen 518172, Guangdong, China.

5 <sup>b</sup>Research Laboratory for Biomedical Optics and Molecular Imaging, Shenzhen Institutes of Advanced Technology, Chinese  
6 Academy of Sciences, Shenzhen 518055, Guangdong, China. E-mail: qchao.sun@siat.ac.cn

7 <sup>c</sup>Department of Laboratory Medicine of Pingshan District Maternal & Child Healthcare Hospital, Shenzhen 518122,  
8 Guangdong, China. E-mail: 635999667@qq.com

9 † \*Corresponding authors.

14

15

16

17

18

19

20

21

22

23

24

25

26

27

28

29

## 30 Supplementary Text

### 31 1. Introduction

32 In recent years, much attention has been paid to the research of organic afterglow materials.  
33 There are several types of organic afterglow systems that have been developed, such as:  
34 Phenylenevinylene(PPV),<sup>1</sup> thioether,<sup>2</sup> Schaap's Dioxetanes,<sup>3</sup> and porphyrins.<sup>4</sup> Characteristically,  
35 these organic afterglow materials offer notable benefits, including high biosafety, effective  
36 biodegradability, and versatile surface functionalization options.<sup>5, 6</sup> Organic afterglow materials  
37 offer great opportunities to overcome the above barriers to inorganic afterglow materials for in  
38 vivo bioimaging due to their biocompatible components and flexible designability.

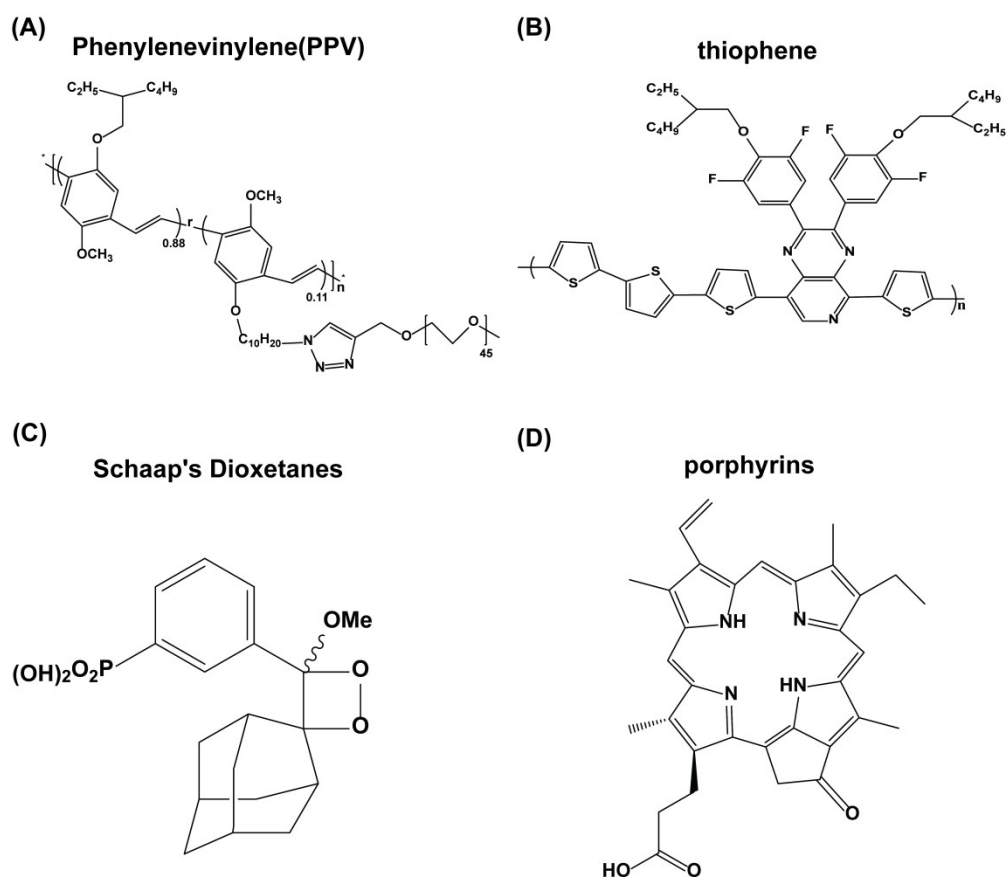

39

40 Figure S1. Chemical structures of four organic afterglow materials. (A) Phenylenevinylene(PPV).<sup>1</sup>

41 (B) thioether.<sup>2</sup> (C) Schaap's Dioxetanes.<sup>3</sup> (D) porphyrins.<sup>4</sup>

42

43

44

## 45 2. Experimental Section

### 46 2.1 Synthesis of CYQ [7].

47 **3-ethyl-1,1,2-trimethyl-1*H*-benzo[*e*]indol-3-ium iodide 1:** To a solution of 1,1,2-trimethyl -1*H*-  
48 benzo[*e*]indole (1.05 g, 5.0 mmol) in toluene (10 mL), EtI (0.48 mL, 6.0 mmol) was added under  
49 argon atmosphere. The reaction mixture was stirred under reflux for overnight, then allowed to  
50 cool to room temperature. The solvent was removed under vacuum filtration and the residue was  
51 washed with ether to afford the desired product **1** (1.5 g, 82%) as a blue solid. <sup>1</sup>H NMR (400 MHz,  
52 CDCl<sub>3</sub>) δ 8.16-8.03 (m, 3H), 7.81 (d, *J* = 8.9 Hz, 1H), 7.74 (t, *J* = 7.4 Hz, 1H), 7.68 (t, *J* = 7.4 Hz,  
53 1H), 4.89 (q, *J* = 7.4 Hz, 2H), 3.24 (s, 3H), 1.88 (s, 6H), 1.67 (t, *J* = 7.4 Hz, 3H).

54 **2-((*E*)-2-((*E*)-2-chloro-3-((*E*)-2-(3-ethyl-1,1-dimethyl-1,3-dihydro-2*H*-benzo[*e*]indol-2-  
55 ylidene)ethylidene)cyclohex-1-en-1-yl)vinyl)-3-ethyl-1,1-dimethyl-1*H*-benzo[*e*]indol-3-ium  
56 iodide CYQ:** To a solution of compound **1** (182.5 mg, 0.5 mmol) in EtOH (10 mL), sodium  
57 acetate (41 mg, 0.5 mmol) and *N*-((*E*)-(2-chloro-3-((*E*)-(phenylimino)methyl)cyclohex-2-en-1-  
58 ylidene)methyl) aniline hydrochloride (90 mg, 0.25 mmol) was added gradually under argon  
59 atmosphere. The reaction mixture was stirred under reflux for 4 h, then allowed to cool to room  
60 temperature. After evaporation of solvent, the residue was purified by flash chromatography  
61 (MeOH/acetone/CH<sub>2</sub>Cl<sub>2</sub>, 2.5/12.5/85) to afford CYQ (140 mg, 76%) as a green solid. <sup>1</sup>H NMR  
62 (400 MHz, MeOD) δ 8.59 (d, *J* = 14.3 Hz, 2H), 8.30 (d, *J* = 8.5 Hz, 2H), 8.07 (d, *J* = 8.8 Hz, 2H),  
63 8.03 (d, *J* = 8.2 Hz, 2H), 7.71-7.63 (m, 4H), 7.56-7.50 (m, 2H), 6.37 (d, *J* = 14.2 Hz, 2H), 4.38 (q,  
64 *J* = 7.2 Hz, 4H), 2.81 (t, *J* = 6.1 Hz, 4H), 2.07-2.01 (m, 14H), 1.51 (t, *J* = 7.2 Hz, 6H). HRMS  
65 (MALDI-TOF) *m/z*: [M-I]<sup>+</sup> calcd for C<sub>42</sub>H<sub>44</sub>ClN<sub>2</sub><sup>+</sup>: 611.312; Found: 611.271

### 66 2.2 Synthesis of CYQI.

67 **1,1,2-trimethyl-7-(tributylstannyl)-1*H*-benzo[*e*]indole 5 [8]:** A mixture of compound **4** (58 mg,  
68 0.2 mmol), (*n*-Bu<sub>3</sub>Sn)<sub>2</sub> (0.4 mL, 0.4 mmol) and (Ph<sub>3</sub>P)<sub>4</sub>Pd (23 mg, 0.02 mmol) in a mixed solvent  
69 (5 mL, 1:1 dioxane/Et<sub>3</sub>N) was stirred under reflux for 20 h under argon. The solvent was removed,  
70 and the residue was purified by flash chromatography (PE/EA:1/0 to 1/4) to afford compound **5**  
71 (72 mg, 72%). <sup>1</sup>H NMR (400 MHz, CDCl<sub>3</sub>) δ 8.04 (s, 1 H), 7.97 (d, *J* = 8.3 Hz, 1H), 7.82 (d, *J* =  
72 8.4 Hz, 1H), 7.76 (d, *J* = 8.4 Hz, 1H), 7.63 (d, *J* = 8.0 Hz, 1H), 2.38 (s, 1H), 1.67-1.50 (m, 12H),  
73 1.40-1.30 (m, 6H), 1.22-1.05 (m, 6 H), 0.91 (t, *J* = 7.3 Hz, 3H).

74 **7-iodo-1,1,2-trimethyl-1*H*-benzo[*e*]indole 6 [2]:** To a solution of compound **5** (67 mg, 0.13 mmol)  
75 in CHCl<sub>3</sub> (13 mL) was added I<sub>2</sub> solution (171 mg, 0.67 mmol in 13 mL CHCl<sub>3</sub>) dropwise at rt,

76 then the mixture was stirred for 30 min and quenched with sat. Na<sub>2</sub>SO<sub>3</sub>, after extraction with  
77 CHCl<sub>3</sub>, the combine organic phase was dried on MgSO<sub>4</sub>, filtered and concentrated to give crude  
78 product which was purified on silica gel (PE/EA: 2/1) to afford compound **6** (19 mg, 44%). <sup>1</sup>H  
79 NMR (400 MHz, CDCl<sub>3</sub>) δ 8.04 (s, 1 H), 7.79-7.63 (m, 4H), 2.34 (s, 3H), 1.46 (s, 6H).

80 **3-ethyl-7-iodo-1,1,2-trimethyl-1H-benzo[e]indol-3-ium iodide 7**: To a solution of compound **6**  
81 (55 mg, 0.16 mmol) in AcCN (4 mL), EtI (0.04 mL, 0.5 mmol) was added under argon  
82 atmosphere. The reaction mixture was stirred under reflux for 36 h, then allowed to cool to room  
83 temperature. The solvent was removed, the crude product was purified on basic Al<sub>2</sub>O<sub>3</sub> (PE/EA:  
84 50/1) to afford the desired product **7** (25 mg, 31%). <sup>1</sup>H NMR (400 MHz, MeOD) δ 8.12 (s, 1 H),  
85 7.74 (d, *J* = 9.0 Hz, 1H), 7.58 (t, *J* = 10.1 Hz, 2H), 7.06 (d, *J* = 8.7 Hz, 1H), 3.68 (q, *J* = 7.0 Hz,  
86 2H), 1.59 (s, 6H), 1.19 (t, *J* = 7.0 Hz, 3H).

87 **2-((E)-2-((E)-2-ethoxy-3-((E)-2-(3-ethyl-7-iodo-1,1-dimethyl-1,3-dihydro-2H-benzo[e]indol-2-  
88 ylidene)ethylidene)cyclohex-1-en-1-yl)vinyl)-3-ethyl-7-iodo-1,1-dimethyl-1H-benzo[e]indol-3-  
89 ium iodide CYQI**: To a solution of compound **7** (25 mg, 0.05 mmol) in EtOH (2 mL), sodium  
90 acetate (4.2 mg, 0.5 mmol) and *N*-((E)-2-chloro-3-((E)-(phenylimino)methyl)cyclohex-2-en-1-  
91 ylidene)methyl)aniline hydrochloride (9.3 mg, 0.25 mmol) was added gradually under argon  
92 atmosphere. The reaction mixture was stirred under reflux for 20 h, then allowed to cool to room  
93 temperature. After evaporation of solvent, the residue was purified by preparative TLC  
94 (MeOH/CH<sub>2</sub>Cl<sub>2</sub>, 1/10) to afford CYQI (16.5 mg, 33%) as a green solid. <sup>1</sup>H NMR (400 MHz,  
95 MeOD) δ 8.32 (s, 2H), 8.18 (d, *J* = 14.1 Hz, 1H), 7.88-7.78 (m, 6H), 7.45 (d, *J* = 9.2 Hz, 2H), 6.15  
96 (d, *J* = 14.1 Hz, 2H), 4.37-4.29 (m, 4H), 4.14 (q, *J* = 6.9 Hz, 2H), 3.68-3.61 (m, 2H), 2.75-2.60 (m,  
97 4H), 2.22 (t, *J* = 6.9 Hz, 3H), 1.97 (s, 12H), 1.49 (t, *J* = 7.0 Hz, 6H).

98

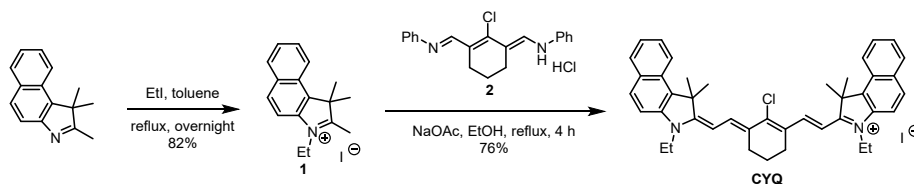

99

100

Figure S2. Synthesis of CYQ.

101

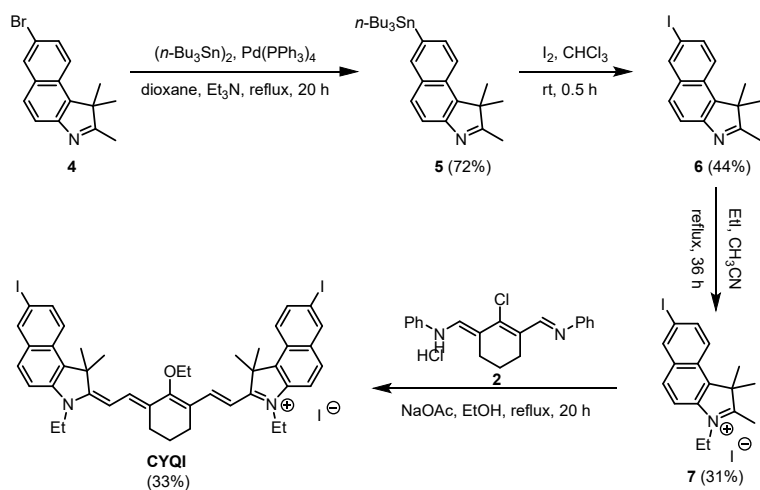

102

103

Figure S3. Synthesis of CYQI

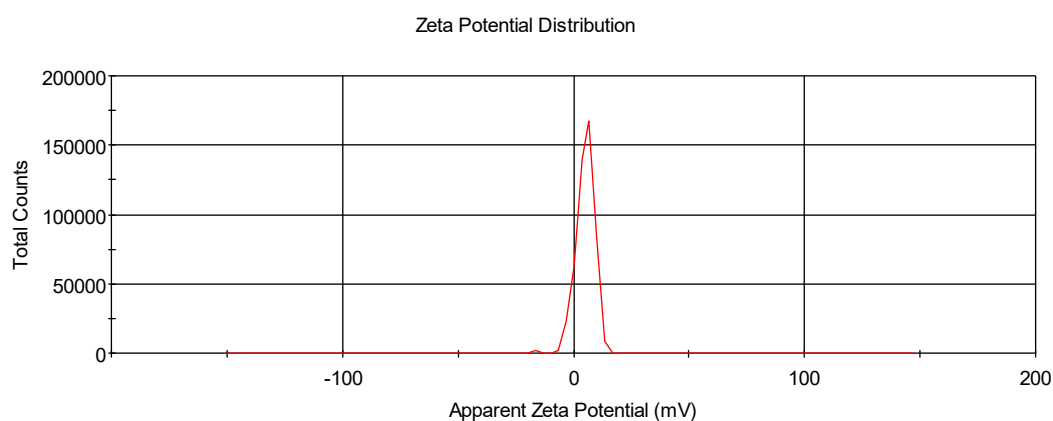

104

105

Figure S4. The zeta potentials of Ru/CYQ@CPPO in PBS.

106

## 107 References

- 108 1. Xie C.; Zhen X.; Miao Q.; Lyu Y.; Pu K. Self-Assembled Semiconducting Polymer Nanoparticles  
 109 for Ultrasensitive Near-Infrared Afterglow Imaging of Metastatic Tumors. *Adv Mater.*, 2018,  
 110 **30**(21):e1801331.
- 111 2. Liao S.; Wang Y.; Li Z.; Zhang Y.; Yin X.; Huan S.; Zhang XB.; Liu S.; Song G. A novel afterglow  
 112 nanoreporter for monitoring cancer therapy. *Theranostics.*, 2022, **12**(16):6883-6897.  
 113 Published 2022 Sep 25.
- 114 3. Schaap, A. P.; Sandison, M.; Handley, R. S. Chemical and enzymatic triggering of 1,2-  
 115 dioxctancs. 3: alkalinc phosphatase-catalyzed chemilumincscncc from an acryl phosphate-  
 116 substituted dioxetane. *Tetrahedron Letters*, 1987, **28**(11):1159-1 162.

- 117 4. Duan X.; Zhang GQ.; Ji S.; Zhang Y.; Li J.; Ou H.; Gao Z.; Feng G.; Ding D. Activatable  
118 Persistent Luminescence from Porphyrin Derivatives and Supramolecular Probes with  
119 Imaging-Modality Transformable Characteristics for Improved Biological  
120 Applications. *Angew Chem Int Ed Engl.*, 2022, **61**(24):e202116174.
- 121 5. Das, P.; Ganguly, S.; Rosenkranz, A.; Wang, B.; Yu, J.H.; Srinivasan, S.; Rajabzadeh, A.R.  
122 MXene/OD nanocomposite architectures: Design, properties and emerging applications.  
123 *Mater. Today Nano.*, 2023, **24**:100428.
- 124 6. Das, P.; Ahmed, S.R.; Srinivasan, S.; Rajabzadeh, A.R. Optical Properties of Quantum Dots.  
125 *In Quantum Dots and Polymer Nanocomposites*; CRC Press: Boca Raton, FL, USA, 2022,**4**: pp.  
126 69–85.
- 127 7. Chang, Z.; Liu, L.J.; Zhai, J.Y.; Liu, C.C.; Wang, X.; Liu, C.B.; Xie, X.J.; Sun, Q.C. Molecular  
128 Electronic Coupling-Induced Photoacoustics for NIR-I/II Duplex in Vivo Imaging. *Chemistry of*  
129 *materials.*, 2023, **35**( 3): 1335-1344.
- 130 8. Cui, M.; Ono, M.; Kimura, H.; Kawashima, H.; Liu, B. L.; Saji, H. Radioiodinated benzimidazole  
131 derivatives as single photon emission computed tomography probes for imaging of  $\beta$ -  
132 amyloid plaques in Alzheimer's disease. *Nucl Med Biol.*, 2011, **38**(3):313-20.
